# Supplementary material for: Magnetically targeted delivery of probiotics for controlled residence and accumulation in the intestine
Source: Royal Society of Chemistry journal article supplement (doi:10.1039/d4nr04753b), 2025-01-01
Supplement: d4nr04753b1.pdf [file d4nr04753b1.pdf]

## Supporting Information

### **Magnetically controlled delivery of probiotics for controlled residence and accumulation in intestine**

Hanye Xing,<sup>‡<sup>a</sup></sup> Xingyu Liu,<sup>‡<sup>a</sup></sup> Ju Wang,<sup>\*<sup>a</sup></sup> Tao Zhou,<sup><sup>a</sup></sup> Xiangxiang Jin,<sup><sup>a</sup></sup> Rui Qiu,<sup><sup>a</sup></sup> Yang Lu,<sup><sup>a</sup></sup> Changhong Liu<sup>\*<sup>a</sup></sup> and Yonghong

Song<sup>\*<sup>a</sup></sup>

---

<sup>a</sup>Anhui Province Key Laboratory of Advanced Catalytic Materials and Reaction Engineering, School of Chemistry and Chemical Engineering, School of Food and Biological Engineering, Hefei University of Technology, Hefei, 230009, China. E-mail: [songyh@hfut.edu.cn](mailto:songyh@hfut.edu.cn), [changhong22@hfut.edu.cn](mailto:changhong22@hfut.edu.cn), [orangezi30940@163.com](mailto:orangezi30940@163.com)

---

## Table of Contents

|                 |   |
|-----------------|---|
| Figure S1 ..... | 2 |
| Figure S2 ..... | 3 |
| Figure S3 ..... | 4 |
| Figure S4 ..... | 5 |
| Figure S5 ..... | 6 |
| Figure S6 ..... | 7 |
| Figure S7 ..... | 8 |
| Figure S8 ..... | 9 |

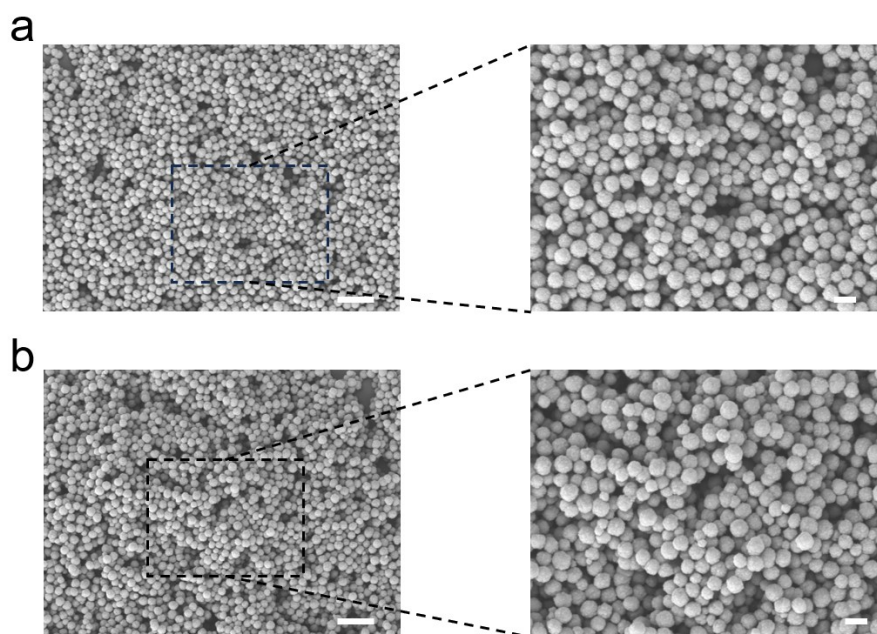

**Fig. S1.** SEM images a) Fe<sub>3</sub>O<sub>4</sub> NPs and b) Fe<sub>3</sub>O<sub>4</sub>-NH<sub>3</sub><sup>+</sup> NPs. Scale bars: 1  $\mu$ m. And the corresponding local magnification. Scale bars: 300 nm.

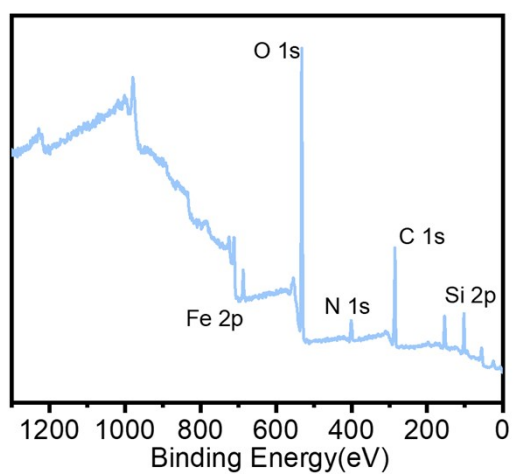

**Fig. S2.** The XPS survey spectra of Fe<sub>3</sub>O<sub>4</sub>-NH<sub>3</sub><sup>+</sup> NPs with survey scan.

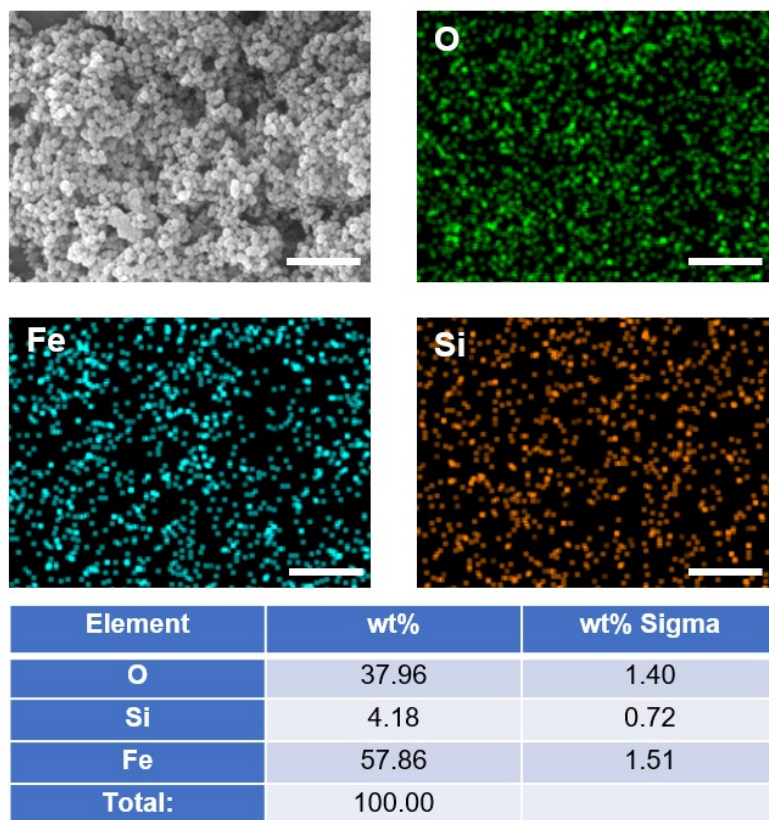

**Fig. S3.** The element distribution and the mass fraction of Fe<sub>3</sub>O<sub>4</sub>-NH<sub>3</sub><sup>+</sup> NPs with elements of O, Fe, Si. Scale bars: 1 μm.

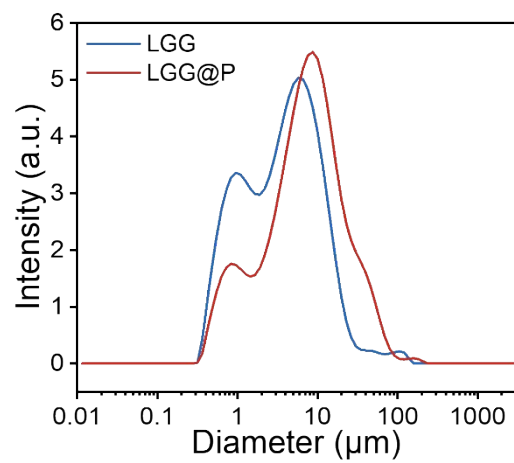

**Fig. S4.** The size changes of LGG before (blue line) and after PDA modification (red line).

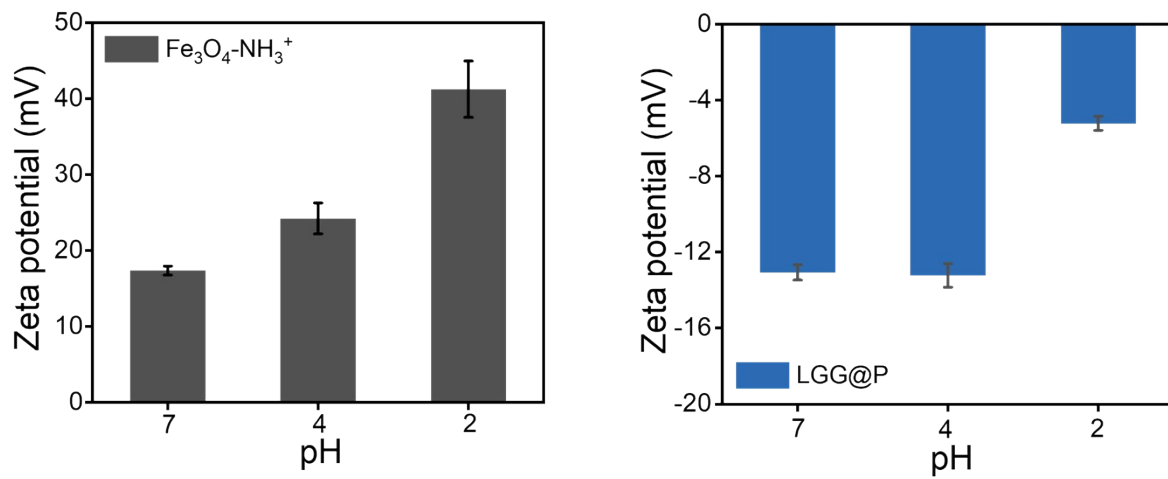

**Fig. S5.** The Zeta potential of (a)  $\text{Fe}_3\text{O}_4\text{-NH}_3^+$  NPs and (b) LGG@P with various pH values treatments for 2 h.

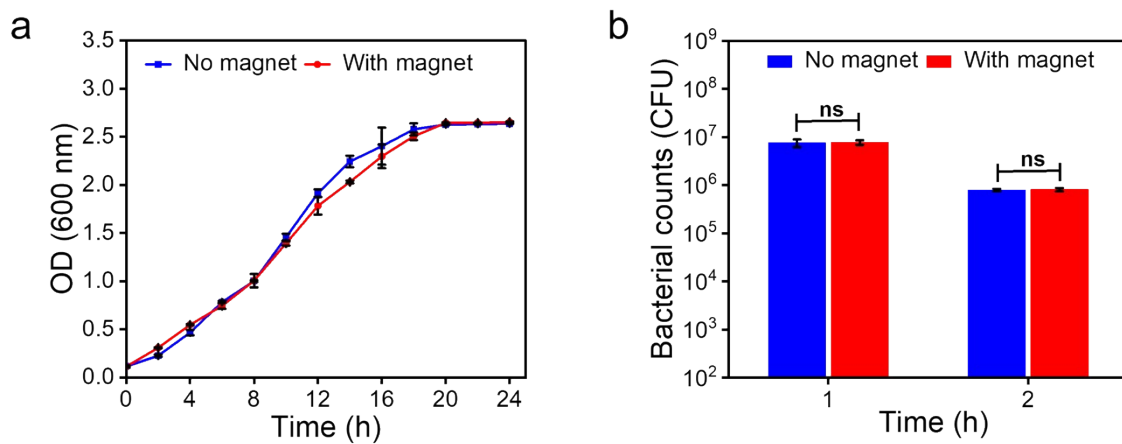

**Fig. S6.** (a) The growth curves of LGG with and without magnet. (b) The bacterial counts of LGG@P@Fe<sub>3</sub>O<sub>4</sub> with and without magnet for different time.



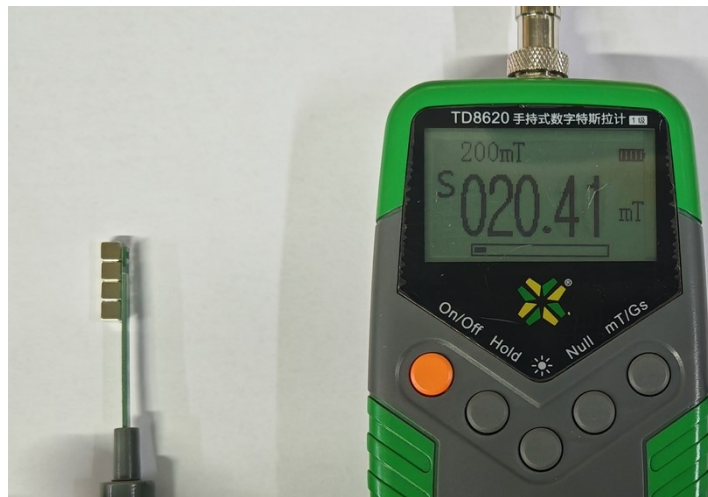

**Fig. S7.** The magnetic field strength of magnet used in in vitro simulation experiment.

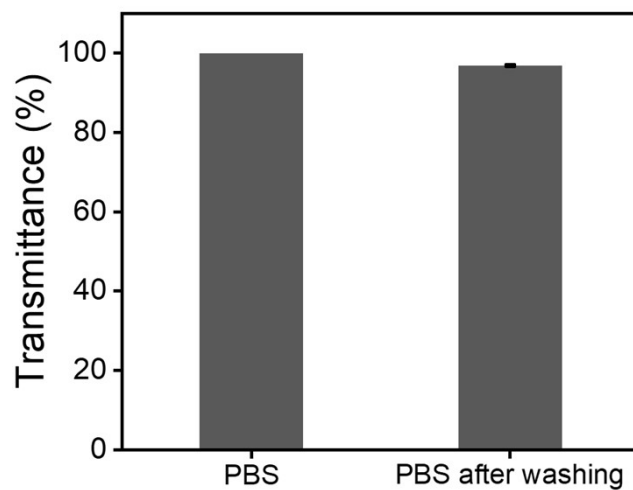

**Fig. S8.** The transmittance of PBS before and after washing demonstrated that LGG@P@Fe<sub>3</sub>O<sub>4</sub> was steadily attracted by a magnet.
